# Supplementary material for: Exploring the low-lying structures of Aun(CO)+ (n = 1–10): adsorption and stretching frequencies of CO on various coordination sites
Source: Royal Society of Chemistry journal article supplement (doi:10.1039/c5ra25494a), 2016-01-01

# Exploring the Low-lying Structures of $Au_n(CO)^+$ ( $n = 1-10$ ): Adsorption and Stretching Frequencies of CO on Various Coordination Sites

Jie Wang,<sup>†,‡,§</sup> Qing-Bo Yan,<sup>‡</sup> Jun Ma,<sup>†</sup> Xizi Cao,<sup>†</sup> Xiaopeng Xing<sup>†,\*</sup> Xuefeng Wang<sup>†</sup>

<sup>†</sup> Department of Chemistry, and Shanghai Key Lab of Chemical Assessment and Sustainability, Tongji University, 1239 Siping Road, Shanghai, 200092, China

<sup>‡</sup> College of Materials Science and Opto-Electronic Technology, University of Chinese Academy of Sciences, Beijing, 100049, China

<sup>§</sup> CHINALCO Research Institute of Science and Technology, Southern District of Future Science & Technology Park, Beijing, 102209, China

---

\*Authors to whom correspondence should be addressed. Tel.: +86-021-65981097;  
Fax: +86-021-65981097; Email: xingxp@tongji.edu.cn

Figure S1

The low lying structures of  $\text{Au}_6(\text{CO})^+$ . All structures were optimized at level I and the relative energies were recalculated at level II. Their electronic states and geometries are indicated. The numbers inside and outside of the parentheses indicate the relative energies from level I and level II, respectively. The structures with a terminal-bonded CO and a bridge-bonded CO are sequenced separately according to their relative energies from level II. Level I: B3LYP functional method with lanl2dz basis set for Au and 6-31G(d) basis sets for C and O. Level 2: B3LYP functional method with Aug-cc-PVTZ-PP basis set for Au and Aug-cc-PVTZ basis sets for C and O.

**$\text{Au}_6(\text{CO})^+$**   
**Head-on Adsorption**

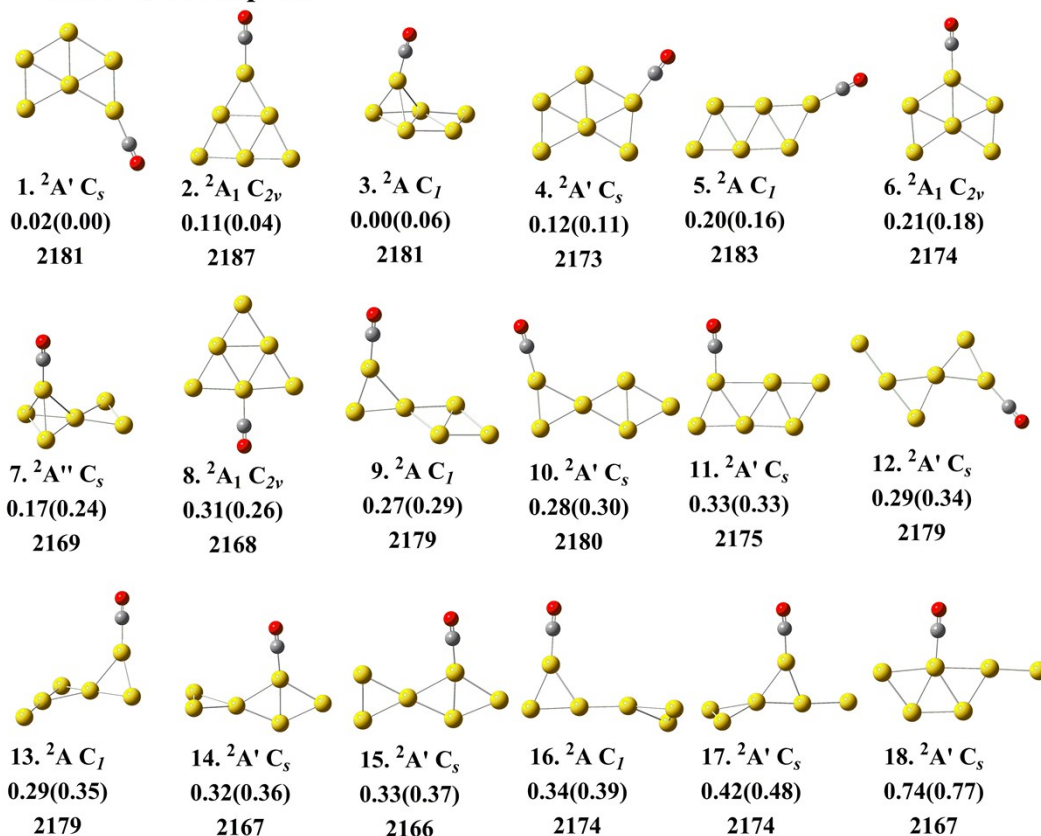

**Bridge Adsorption**

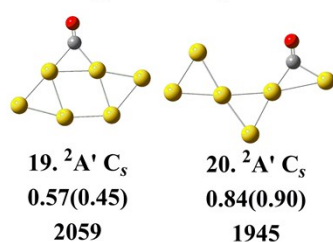

Figure S2

The low lying structures of  $\text{Au}_7(\text{CO})^+$  (similar to Figure S1).

### $\text{Au}_7(\text{CO})^+$

#### Head-on Adsorption

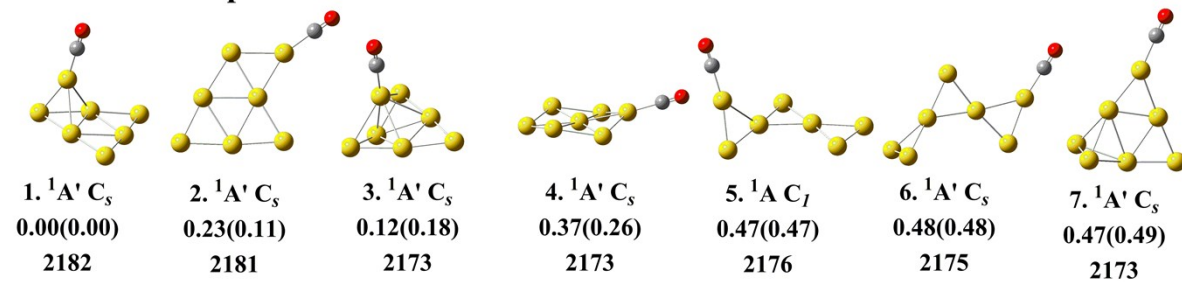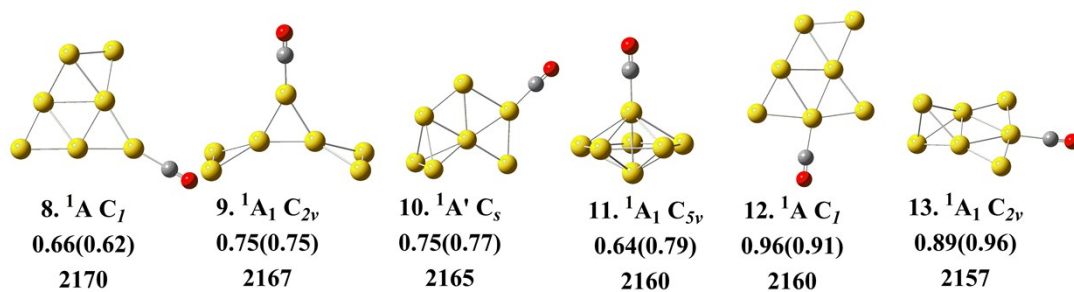

#### Bridge Adsorption

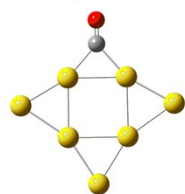

14.  ${}^1\text{A}_1\text{C}_{2v}$   
0.54(0.34)  
2065

Figure S3

The low lying structures of  $\text{Au}_8(\text{CO})^+$  (similar to Figure S1).

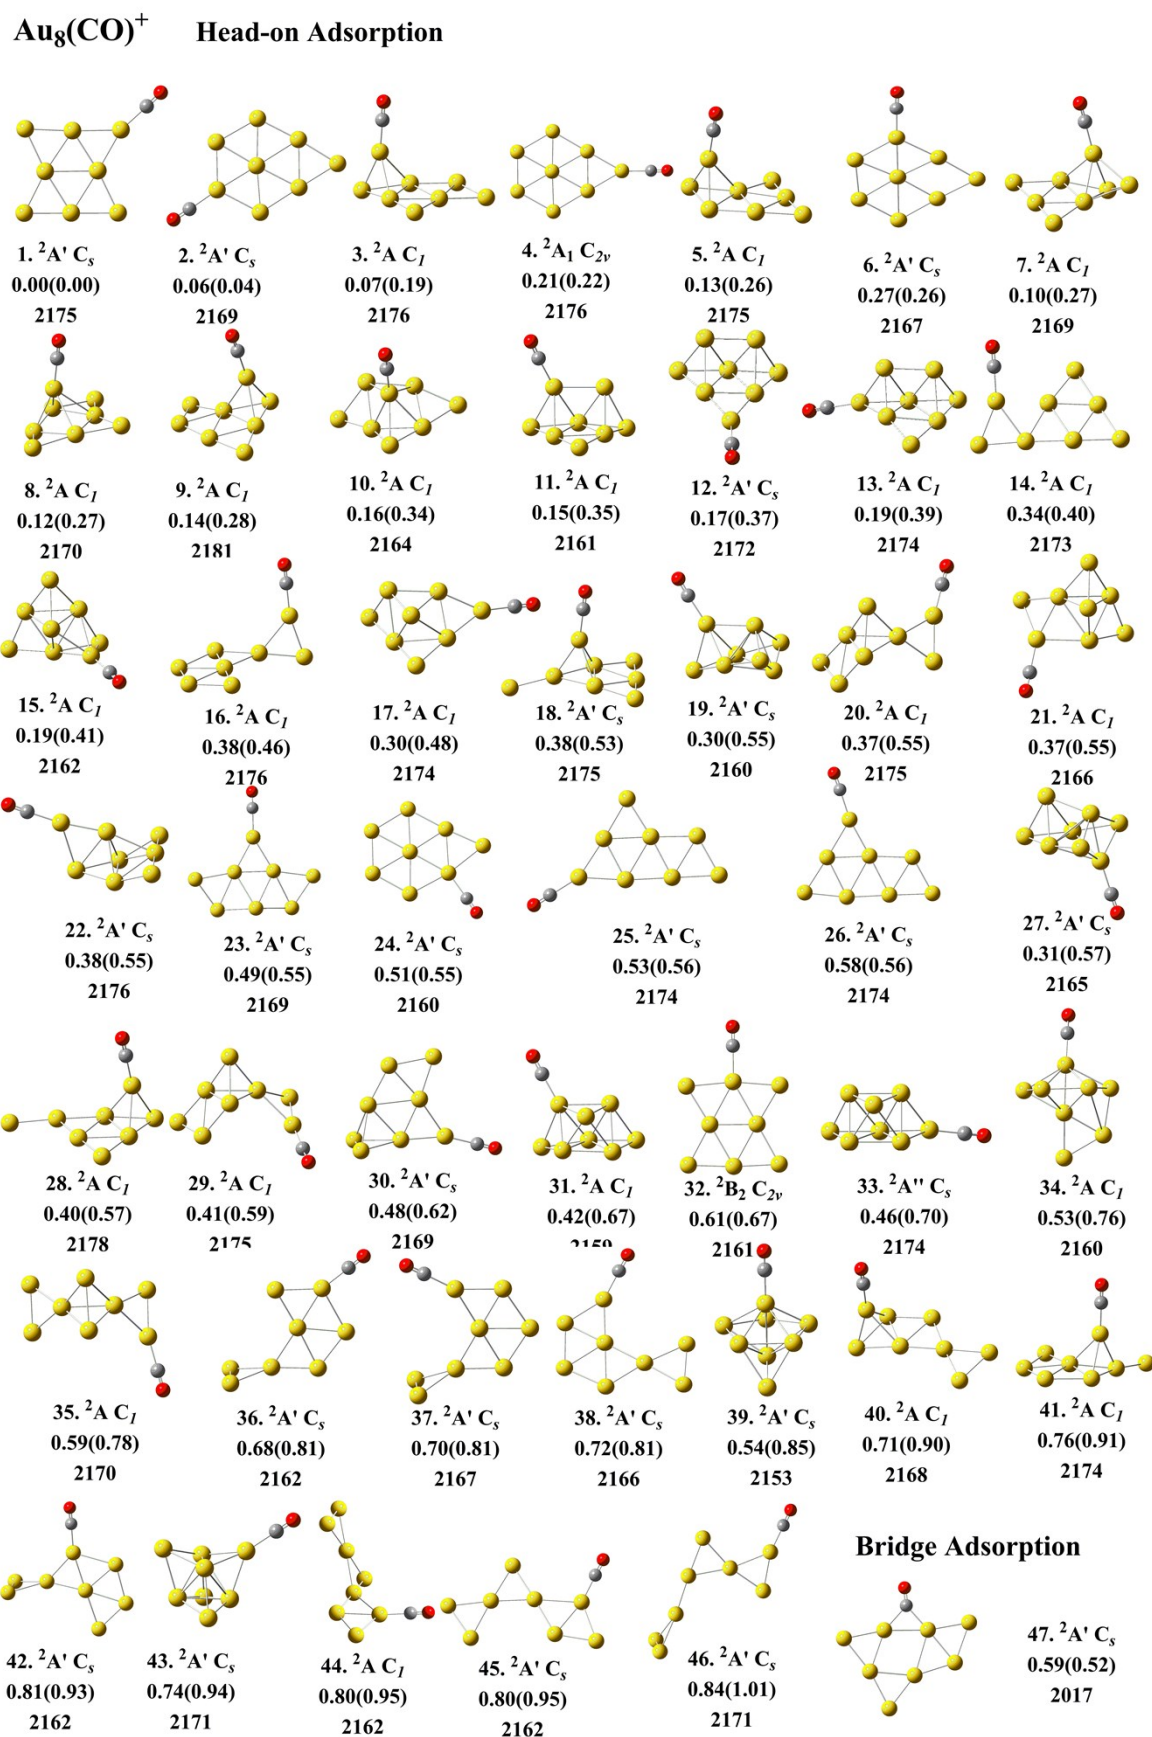

Figure S4

The low lying structures of  $\text{Au}_9(\text{CO})^+$  (similar to Figure S1).

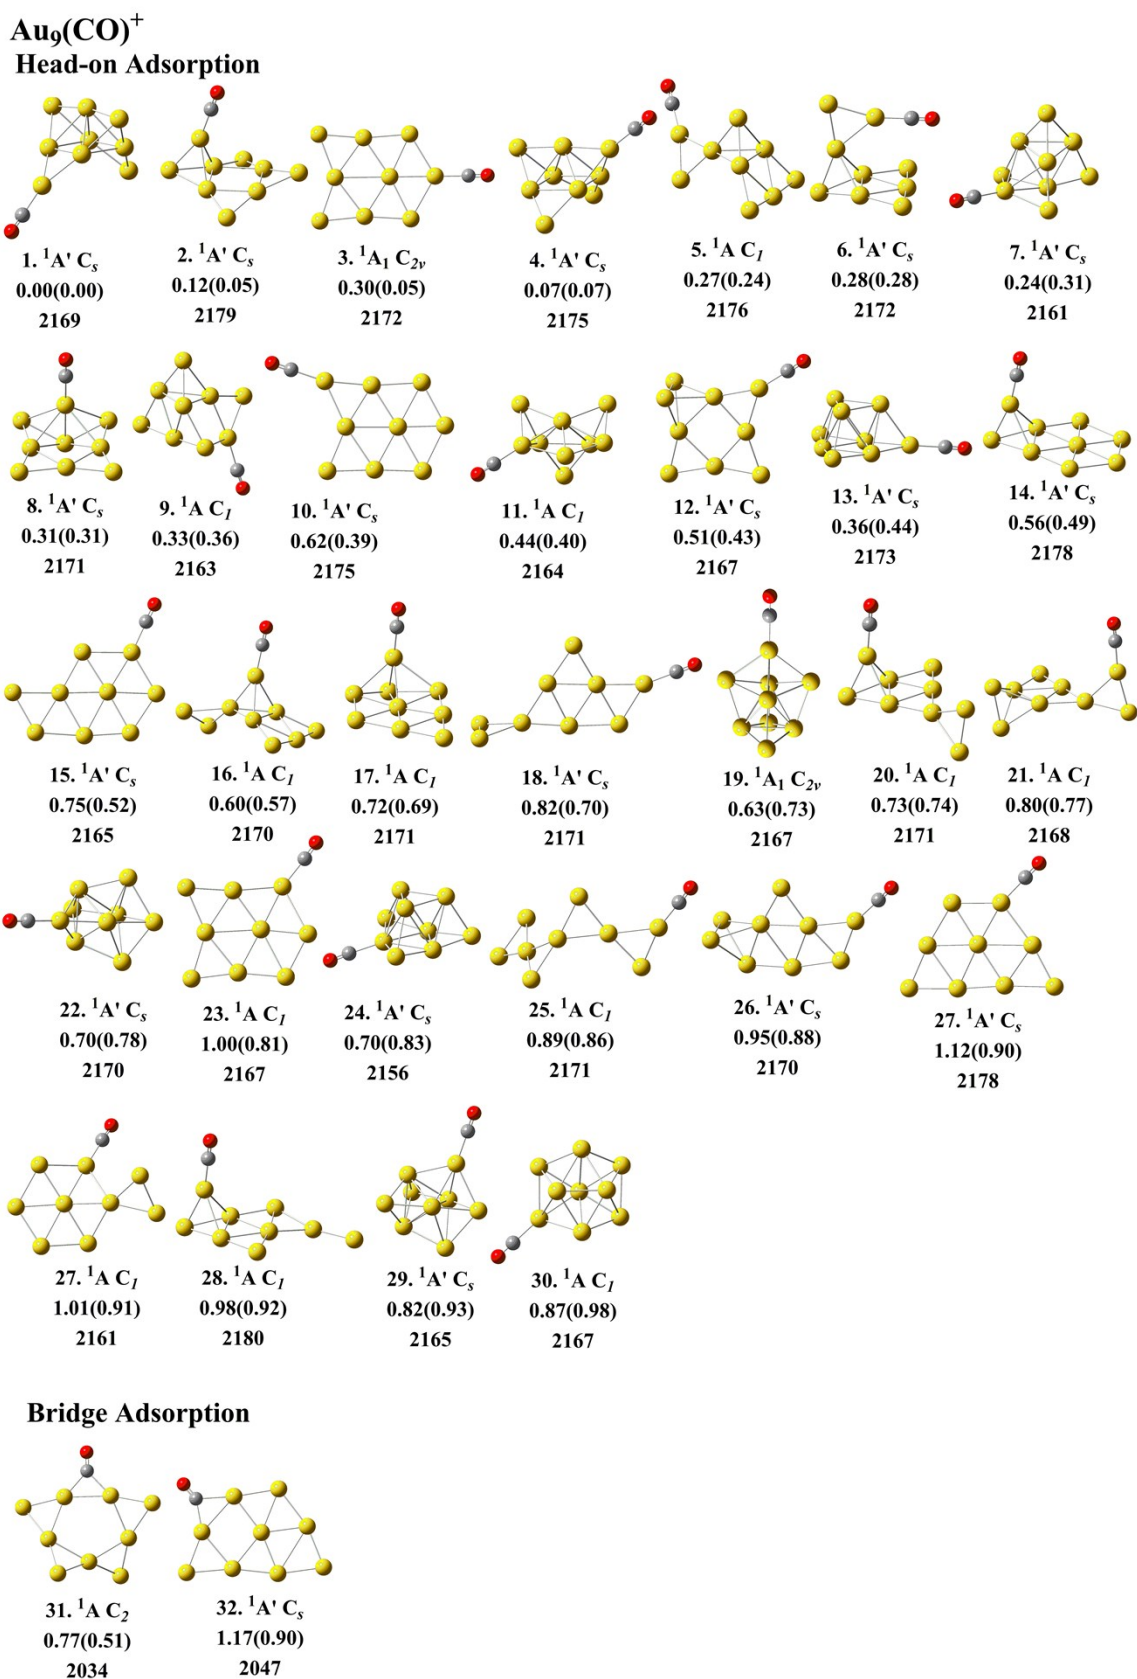



Figure S5

The low lying structures of  $\text{Au}_{10}(\text{CO})^+$  (similar to Figure S1).

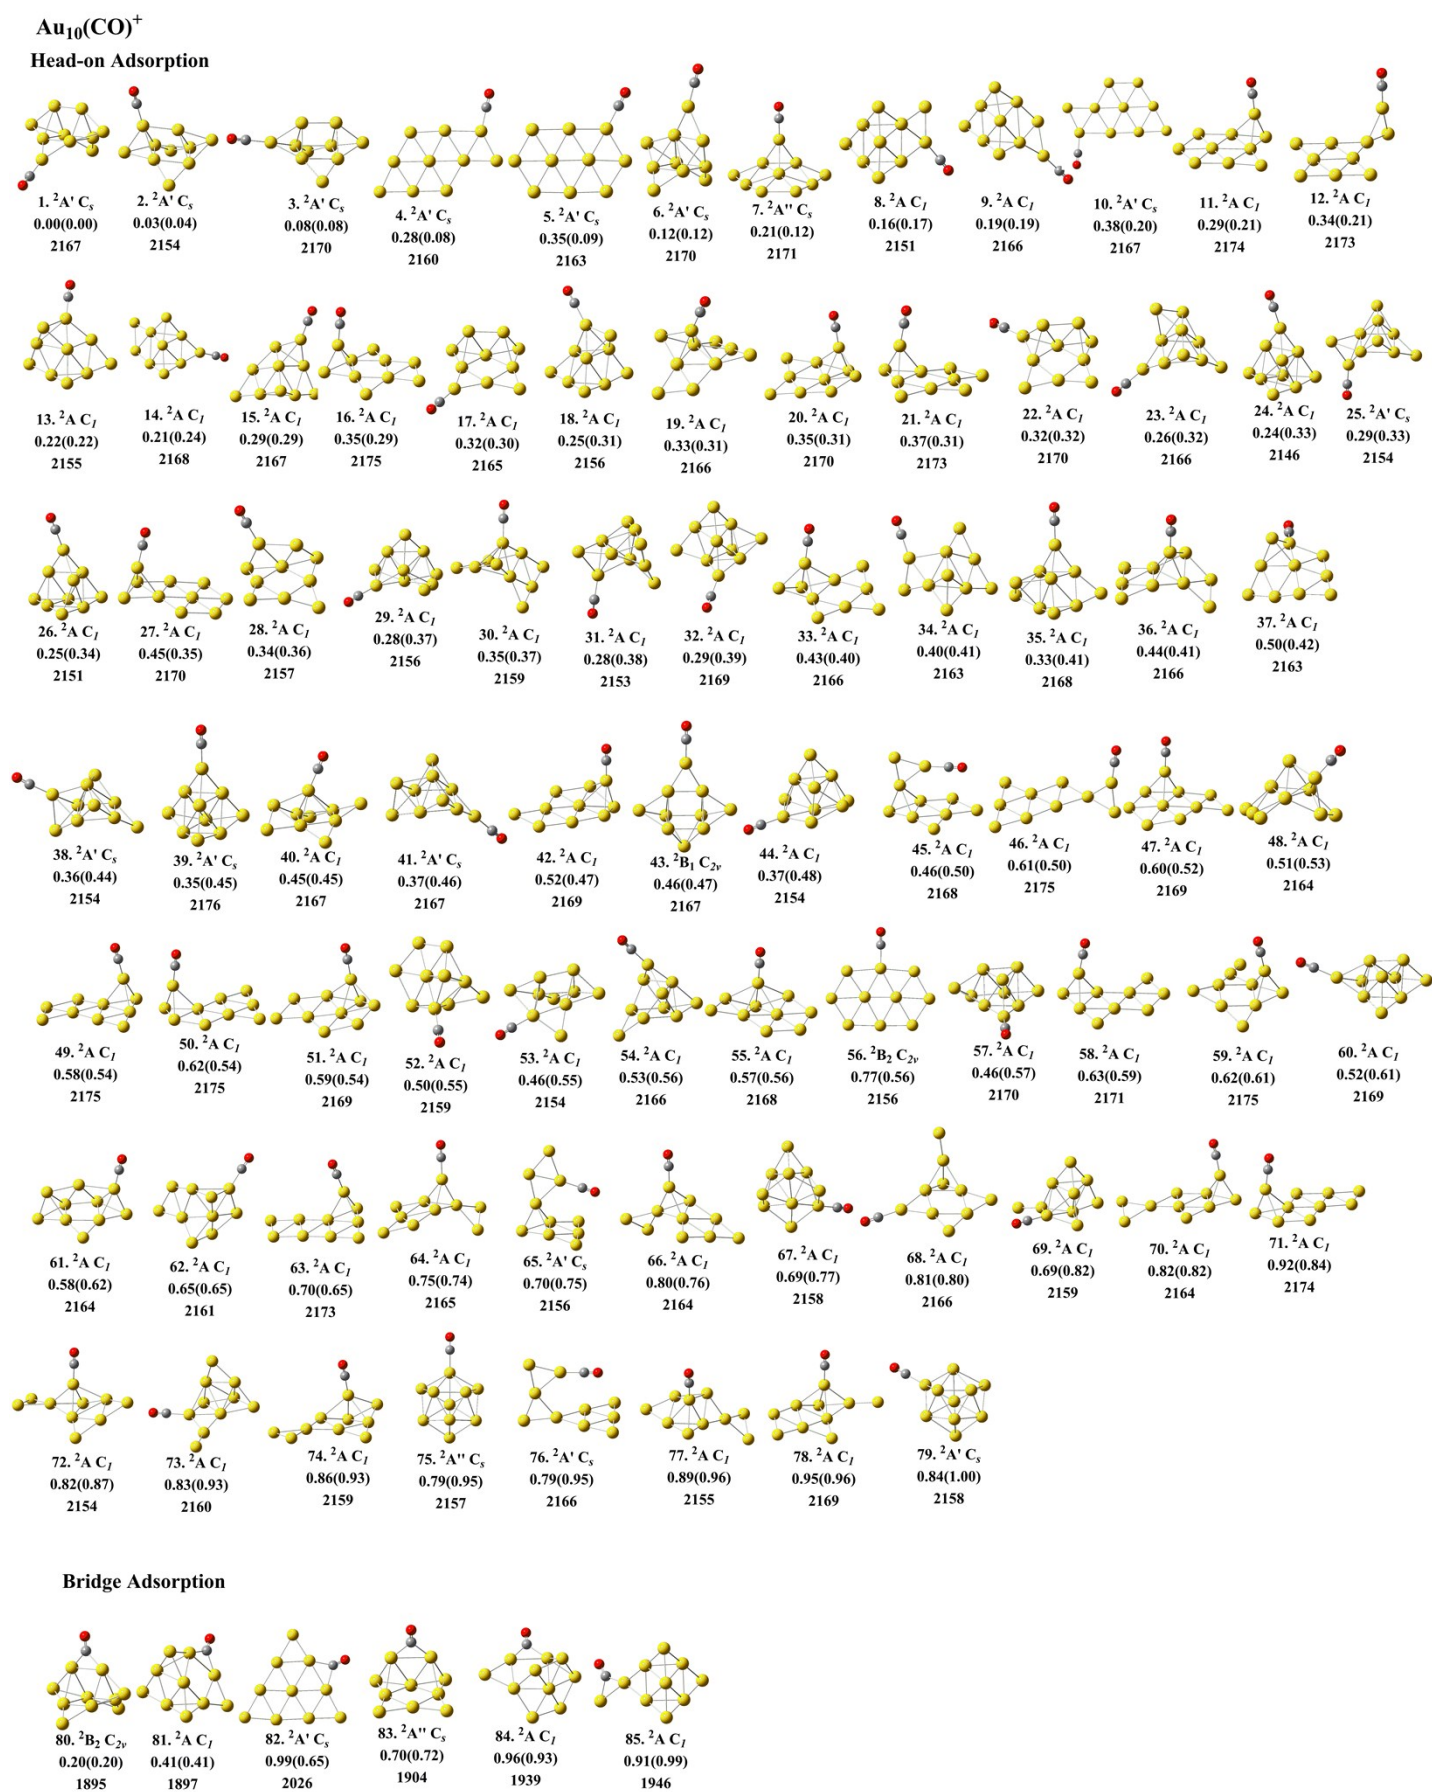

Supplement: c5ra25494a1.pdf [file c5ra25494a1.pdf]
